# Supplementary material for: A Bayesian psychophysics model of sense of agency
Source: PubMed Central journal article supplement (PMC6751175; doi:10.1038/s41467-019-12170-0), 2019-09-18
Supplement: 41467_2019_12170_MOESM1_ESM.pdf [file 41467_2019_12170_MOESM1_ESM.pdf]

## Supplementary Source Codes

For the manuscript “A Bayesian psychophysics model of sense of agency”  
by Roberto Legaspi & Taro Toyoizumi  
Emails: {roberto.legaspi, taro.toyoizumi}@riken.jp

This supplementary information contains the MATLAB source codes that were used to generate the simulation data and plot the computation results for analyses.

Following is the order in which the main codes should be compiled and executed:

1. create\_SimulationData.m.
2. find\_muAO.m
3. compute\_PXisPrcShfts.m. The plots that were generated here were shown in Figs. 2 and 5b.
4. compute\_PerTrialPrcShfts.m. The plots were shown in Figs. 3b, 3c, 3d and 3e, as well as 4c and 4d.
5. compute\_CCEPXi1.m. The plots that were generated from this were shown in Figs. 4a and 6a.
6. compute\_PerTrialCCE.m. The plots were shown in Figs. 4b and 6b.

The descriptions and objectives of each of the above are written in their codes. Note that to generate the results that correspond to the two intentional binding experiments that were studied, the variable *Expr* should be assigned the value 1 and 2 for Haggard et al.’s (Ref [3]) and Wolpe et al.’s (Ref [22]) studies, respectively.

Lastly, the following auxiliary source codes are called by the main codes described above:

1. soa\_IBexperiment.m
2. soa\_IBTargets.m
3. soa\_InitMatrix.m
4. soa\_sortMatrices.m
5. soa\_plotPrcShfts.m
6. soa\_plotErrorBars.m
7. soa\_plotBehaviors.m

```

% Published: August 14, 2019
% Copyright
% Lab for Neural Computation and Adaptation
% RIKEN Center for Brain Science
%
% Objective: Create the noisy sensory input signals arriving at various times ta0A and ta00

% Cleaners
clear
clc
close all

%{
Only if random generation should be repeatable
rng(1,'twister');
%}

% Simulation conditions
taoInstances = 35000;
Expr = 1; numCond = 3;

tAp=0; dist_tAt0=250; tOp=tAp+dist_tAt0;

for CondB0 = 1:numCond
    % Initialize baseline parameters with reported empirical data
    [muA, sigmaA, mu0, sigma0] = soa_IBexperiment(Expr, CondB0);

    % Generate from Gaussian distributions
    Vec_taoA = normrnd(tAp + muA, sigmaA, [1 taoInstances]);
    Vec_tao0 = normrnd(tOp + mu0, sigma0, [1 taoInstances]);

    % Check the generated data
    figure; normplot(Vec_taoA);
    figure; normplot(Vec_tao0);
    figure; histfit(Vec_taoA);
    figure; histfit(Vec_tao0);
}

% Generate statistics
sizeVec_taoA = numel(Vec_taoA);
sizeVec_tao0 = numel(Vec_tao0);
taoA_min = min(Vec_taoA); taoA_max = max(Vec_taoA);
tao0_min = min(Vec_tao0); tao0_max = max(Vec_tao0);
uVectaoA = mean(Vec_taoA); stdVectaoA = std(Vec_taoA);
uVectao0 = mean(Vec_tao0); stdVectao0 = std(Vec_tao0);

% Store generated simulation data
fprintf('\n===== tao DataSet Expr %d Cond %d =====\n', Expr, CondB0);
fprintf('taoA [%0.2f, %0.2f] tao0 [%0.2f, %0.2f]\n', taoA_min, taoA_max, tao0_min, tao0_max);
fprintf('tao statistics: %0.2f \t (%0.2f) \t %0.2f \t (%0.2f) \n', uVectaoA, stdVectaoA, uVectao0, stdVectao0);
fprintf('taoA elements: %d tao0 elements: %d\n', sizeVec_taoA, sizeVec_tao0);
fprintf('=====\n');
fnametaoA = sprintf('Exp%dCond%d_Vec_taoA.csv', Expr, CondB0);
fnametao0 = sprintf('Exp%dCond%d_Vec_tao0.csv', Expr, CondB0);
dlmwrite(fnametaoA, Vec_taoA, 'delimiter', ',');
dlmwrite(fnametao0, Vec_tao0, 'delimiter', ',');
end

```

```

% Published: August 14, 2019
% Copyright
% Lab for Neural Computation and Adaptation
% RIKEN Center for Brain Science
%
% Objective: Find the optimal value for the free parameter muA0 using Haggard et al.'s data,
% with sigma0 equal to 10ms.
% Cleaners
clear
clc
close all
% Simulation Conditions
taoInstances = 35000;
Expr = 1; numCond = 3;
tAp=0; dist_tAt0=250; tOp=tAp+dist_tAt0;
sigmaA0 = 10;
for muA0 = [190 200 210 220 230 240 250]
    fprintf('Action and outcome perceptual shifts per condition given muA0=%d\n', muA0);
    sumError = 0;
    for CondB0 = 1:numCond
        % Read from files taoA and tao0 values derived from a Gaussian distribution
        frametaoA = sprintf('Exp%dCond%d_Vec_taoA.csv', Expr, CondB0);
        frametao0 = sprintf('Exp%dCond%d_Vec_tao0.csv', Expr, CondB0);
        Vec_taoA = dlmread(frametaoA);
        Vec_tao0 = dlmread(frametao0);
        % Get the reported empirical baseline parameters
        [muA, sigmaA, mu0, sigma0] = soa_IBexperiment(Expr, CondB0);
        % Compute for sigma Tot
        sigmaTot2 = sigmaA^2 + sigma0^2 + sigmaA0^2;
        % Compute the action and outcome perceptual shifts
        Vec_PrcShftA = (sigmaA^2 / sigmaTot2) * (Vec_tao0 - Vec_taoA - muA0);
        Vec_PrcShft0 = -(sigma0^2 / sigmaTot2) * (Vec_tao0 - Vec_taoA - muA0);
        uVec_PrcShftA = mean(Vec_PrcShftA); sdVec_PrcShftA = std(Vec_PrcShftA);
        uVec_PrcShft0 = mean(Vec_PrcShft0); sdVec_PrcShft0 = std(Vec_PrcShft0);
        ruVec_PrcShftA = round(uVec_PrcShftA); rsdVec_PrcShftA = round(sdVec_PrcShftA);
        ruVec_PrcShft0 = round(uVec_PrcShft0); rsdVec_PrcShft0 = round(sdVec_PrcShft0);
        % Compute for model estimation errors given the reported empirical results
        [targPrcShftA, targPrcShft0] = soa_IBTargets(Expr, CondB0);
        errPrcShft = abs(ruVec_PrcShftA - targPrcShftA);
        %f
        NOTE: Even when we consider the average of action and outcome estimation errors,
        the optimal result is the same.
        errPrcShft = (abs(ruVec_PrcShftA - targPrcShftA) + abs(ruVec_PrcShft0 - targPrcShft0))/2;
        %f
        sumError = sumError + errPrcShft;
    end
    fprintf('Condition %d:\t %0.1f(%0.2f)\t %0.1f(%0.2f)\n', CondB0, ruVec_PrcShftA, rsdVec_PrcShftA, ruVec_PrcShft0, rsdVec_PrcShft0);
end
modelEE = sumError/numCond;
fprintf('model estimation error:\t%0.2f:\n\n', modelEE);
if muA0~=190 || (muA0~=190 && modelEE < min_modelEE)

```

```
min_modelEE = modelEE;
opt_muA0 = muA0;
end
fprintf('Optimal muA0 is %d ms.\n', opt_muA0);
%{
Notes to METHODS:
- Estimates of the perceptual shift in action timing alone was sufficient to indicate
  the optimal muA0.
- The optimal muA0 for Experiment 1 (Haggard et al.) is 230 ms.
- Retain this same muA0 value for Experiment 2 (Wolpe et al.).
%}
```

```

% Published: August 14, 2019
% Copyright
% Lab for Neural Computation and Adaptation
% RIKEN Center for Brain Science

% Objective: Fit Haggard et al.'s data to find the optimal value for the free parameter  $P(X_i=1)$ ,
%            $\mu_{A0}$  is 230ms and  $\sigma_{A0}$  is 10ms.
%           Plot the action and outcome perceptual shifts given  $P(X_i=1)$  in the range
%           [0,0,1,0] with 0,1 increments

% Cleaners
clear
clc
close all

% Graph display fonts
fontSize = 20;
sizeBin = 200;

% Simulation Conditions
taoInstances = 35000;
Expr = 1; numCond = 3;

tAp=0; dist_tAt0=250; tOp=tAp+dist_tAt0;

% Optimal condition-independent parameters
muA0 = 230;
sigmaA0 = 10;

% Interval length in consideration
T = 250;

% Data Matrices
LB = 0.0; INC = 0.1; UB = 1.0;
arrPX11 = LB:INC:UB;
size_px11 = numel(arrPX11);
arrPrsShftA = zeros(numCond,size_px11);
arrPrsShft0 = zeros(numCond,size_px11);
arrA0Binding = zeros(numCond,size_px11);

for CondB0 = 1:numCond

    % Read from files taoA and tao0 values derived from a Gaussian distribution
    fnameTaoA = sprintf('Exp%dCond%d_Vec_taoA.csv',Expr,CondB0);
    fnameTao0 = sprintf('Exp%dCond%d_Vec_tao0.csv',Expr,CondB0);
    Vec_taoA = dimread(fnameTaoA);
    Vec_tao0 = dimread(fnameTao0);

    indXPX11 = size_px11 + 1;
    for PX1_1 = UB:-INC:LB
        PX1_0 = 1 - PX1_1;

        % Matrices to track optimal action and outcome estimates
        Vec_PrcShftA = soa_InitMatrix(1,taoInstances);
        Vec_PrcShft0 = soa_InitMatrix(1,taoInstances);
        Vec_A0Binding = soa_InitMatrix(1,taoInstances);

        for indx_tao = 1:taoInstances

            % Do for each pair of taoA and tao0
            taoA = Vec_taoA(indx_tao);
            tao0 = Vec_tao0(indx_tao);

            % Number of taoA and tao0 instances to be generated
            % Experimental set-up
            % Haggard et al. (2002) : Expr = 1; NumCond = 3; (Vol, Invol, Sham)
            % Wolpe et al. (2013) : Expr = 2; NumCond = 3; (Low, Int, High)
            % Actual physical stimulus timings

            % Large enough but finite constant

```

```

% Get the reported empirical baseline parameters
[lmuA, sigmaA, mu0, sigma0] = soa_IBexperiment(EXPR, CondB0);

% Compute for the posterior-ratio
Z1 = sqrt(2*pi)*sigmaA0*t;
Z0 = T^2;
Theta = log((PXi_1*Z0)/(PXi_0*Z1));
sigmaTot2 = sigmaA^2 + sigma0^2 + sigmaA0^2;
r = exp(Theta - ((tao0-taoA-muA0)^2/(2*sigmaTot2)));

% Compute for strength of temporal binding
if r > 1 % Causal
    tAhat = taoA + (sigmaA^2/sigmaTot2)*(tao0-taoA-muA0);
    t0hat = tao0 - (sigma0^2/sigmaTot2)*(tao0-taoA-muA0);
    XiHat = 1;
else % Accausal
    tAhat = taoA;
    t0hat = tao0;
    XiHat = 0;
end

Vec_PrcShftA(1, indXPxi1) = tAhat - taoA;
Vec_PrcShft0(1, indXPxi1) = t0hat - tao0;
Vec_A0Bbinding(1, indXPxi1) = 250 + (t0hat-tao0) - (tAhat-taoA);
end

uPrcShftA = mean(Vec_PrcShftA(:)); sdPrcShftA = std(Vec_PrcShftA(:));
uPrcShft0 = mean(Vec_PrcShft0(:)); sdPrcShft0 = std(Vec_PrcShft0(:));
uA0Bbinding = mean(Vec_A0Bbinding(:)); sda0Bbinding = std(Vec_A0Bbinding(:));

% Compute for model estimation errors given the reported empirical results
[targPrcShftA, targPrcShft0] = soa_IBTargets(EXPR, CondB0);

ruVec_PrcShftA = round(uPrcShftA);
ruVec_PrcShft0 = round(uPrcShft0);
errPrcShftA = abs(ruVec_PrcShftA - targPrcShftA);
errPrcShft0 = abs(ruVec_PrcShft0 - targPrcShft0);

fprintf('Condition %d \t P(Xi=1): %0.2f\n', CondB0, PXi_1);
fprintf('uPrcShfts \t %0.2f(%0.2f)\t %0.1f(%0.1f)\n', uPrcShftA, sdPrcShftA, uPrcShft0, sdPrcShft0);
fprintf('Error in action perceptual shift: %0.2f\n', errPrcShftA);
fprintf('Error in outcome perceptual shift: %0.2f\n\n', errPrcShft0);

indXPxi1 = indXPxi1 - 1;

arrPrcShftA(CondB0, indXPxi1) = uPrcShftA;
arrPrcShft0(CondB0, indXPxi1) = uPrcShft0;
arrA0Bbinding(CondB0, indXPxi1) = uA0Bbinding;
end
fprintf('\n');
end

% Plot and store the perceptual shifts and action-outcome binding
soa_plotPrcShfts(EXPR, arrPrcShftA, arrPrcShft0, arrXPxi1, fontsize);
fnamePrcShft = sprintf('Exp%d_PXISPrCShtfts.png', EXPR);
saveas(gcf, fnamePrcShft);

soa_plotBehaviors(EXPR, arrA0Bbinding, arrXPxi1, fontsize, 1);
fnamePrcShft = sprintf('Exp%d_PXISPrCShtfts.png', EXPR);
saveas(gcf, fnamePrcShft);

% Store the perceptual shifts

```

```
fnamePrCshftA = sprintf('Exp%d_arrPrCshftA.csv', Expr);
fnamePrCshft0 = sprintf('Exp%d_arrPrCshft0.csv', Expr);
dlmwrite(fnamePrCshftA, arrPrCshftA, 'delimiter', ',');
dlmwrite(fnamePrCshft0, arrPrCshft0, 'delimiter', ',');

%{
Notes to METHODS:
- Estimates of the perceptual shift in action timing alone was sufficient to indicate
  the optimal P(Xi=1) value. However, note the following.
- Although the optimal P(Xi=1) value for the voluntary and involuntary conditions is 1.0,
  the result is saturated. Hence, report P(Xi=1)=0.9 for both conditions.
- Report P(Xi=1)=0.1 for the sham condition, assuming causality is less frequently detected.
- Although the ptimal P(Xi=1) value for the intermediate tone uncertainty condition is 0.5,
  the outcome binding behavior is not consistent with the reported outcome binding.
  Report P(Xi=1)=0.6 for the intermediate tone uncertainty condition since it also best minimized
  the estimation error while reproducing the reported action and outcome bindings.
%}
```

```

% Published: August 14, 2019
% Copyright
% Lab for Neural Computation and Adaptation
% RIKEN Center for Brain Science
%
% Objective: Compute the trial-to-trial temporal binding and repulsion effects,
% as well as the baseline and operant temporal bindings,
% as functions of temporal disparity, i.e., tao0-taoA

% Cleaners
clear
clc
close all

% Graph display fonts
fontSize = 20;
sizeBin = 200;

% Simulation Conditions
taoInstances = 35000;
EXPR = 2; numCond = 3;

tAP=0; dist_tAt0=250; tOp=tAP+dist_tAt0;

% Optimal condition-independent parameters
muA0 = 230;
sigmaA0 = 10;

% Interval length in consideration
T = 250;

% Large enough but finite constant

% Data Matrices
Vec_PrcShftA = zeros(numCond,taoInstances);
Vec_PrcShft0 = zeros(numCond,taoInstances);
Vec_taoI = zeros(numCond,taoInstances);
Vec_OpPrCshfts = zeros(numCond,taoInstances);
Vec_BsPrCshfts = zeros(numCond,taoInstances);

for CondB0 = 1:numCond

% Read from files taoA and tao0 values derived from a Gaussian distribution
fnameTaoA = sprintf('Exp%Cond%d_Vec_taoA.csv',EXPR,CondB0);
fnameTao0 = sprintf('Exp%Cond%d_Vec_tao0.csv',EXPR,CondB0);
Vec_taoA = dlmread(fnameTaoA);
Vec_tao0 = dlmread(fnameTao0);

% Simulated using the fitted P(Xi=1) optimal values
if EXPR==1
    if CondB0 == 1
        PXi_1 = 0.9;
    elseif CondB0 == 2
        PXi_1 = 0.9;
    else
        PXi_1 = 0.1;
    end
elseif EXPR==2
    if CondB0 == 1
        PXi_1 = 0.9;
    elseif CondB0 == 2
        PXi_1 = 0.6;
    else
        PXi_1 = 0.5;
    end
end
end
end

```

```

% clears all variables from the Workspace
% clears the Command Window

```

```

% Number of taoA and tao0 instances to be generated
% Experimental set-up
% Haggard et al. (2002): EXPR = 1; NumCond = 3; (Vol, Invol, Sham)
% Wolpe et al. (2013) : EXPR = 2; NumCond = 3; (Low, Int, High)
% Actual physical stimulus timings

```

```

% Large enough but finite constant

```



```

PXI_0 = 1 - PXI_1;

for indx_tao = 1:taoInstances

    % Do for each pair of taoA and tao0
    taoA = Vec_taoA(indx_tao);
    tao0 = Vec_tao0(indx_tao);

    % Get the reported empirical baseline parameters
    [lnuA, sigmaA, mu0, sigma0] = soa_IBexperiment(Expr, CondB0);

    % Compute for the posterior-ratio
    Z1 = sqrt(2*pi)*sigmaA0*T;
    Z0 = T^2;
    Theta = log((PXI_1*Z0)/(PXI_0*Z1));
    sigmaTot2 = sigmaA^2 + sigma0^2 + sigmaA0^2;
    r = exp(Theta - ((tao0-taoA-muA0)^2/(2*sigmaTot2)));

    % Compute for strength of temporal binding
    if r > 1 % Causal
        tAhat = taoA + (sigmaA^2/sigmaTot2)*(tao0-taoA-muA0);
        t0hat = tao0 - (sigma0^2/sigmaTot2)*(tao0-taoA-muA0);
        Xihat = 1;
    else % Acausal
        tAhat = taoA;
        t0hat = tao0;
        Xihat = 0;
    end

    % Plot and store the perceptual shifts
    sortedtaoI = Vec_taoI;
    [sortedtaoI(1,:), sortIndx1] = sort(Vec_taoI(1,:));
    [sortedtaoI(2,:), sortIndx2] = sort(Vec_taoI(2,:));
    [sortedtaoI(3,:), sortIndx3] = sort(Vec_taoI(3,:));
    sortedPrCsHftA = soa_sortMatrices(Vec_PrCsHftA, sortIndx1, sortIndx2, sortIndx3);
    sortedPrCsHft0 = soa_sortMatrices(Vec_PrCsHft0, sortIndx1, sortIndx2, sortIndx3);
    sortedOPPrCsHfts = soa_sortMatrices(Vec_OPPrCsHfts, sortIndx1, sortIndx2, sortIndx3);
    sortedBSPrCsHfts = soa_sortMatrices(Vec_BSPrCsHfts, sortIndx1, sortIndx2, sortIndx3);

    soa_plotErrorBars(Expr, sortedtaoI, sortedPrCsHftA, fontsize, 1, sizeBin);
    fNamePrCsHft = sprintf(Exp%d_perTriaIPrCsHftA.png,Expr);
    saveas(gcf,fNamePrCsHft);

    soa_plotErrorBars(Expr, sortedtaoI, sortedPrCsHft0, fontsize, 1, sizeBin);
    fNamePrCsHft = sprintf(Exp%d_perTriaIPrCsHft0.png,Expr);
    saveas(gcf,fNamePrCsHft);

    soa_plotErrorBars(Expr, sortedtaoI, sortedBSPrCsHfts, fontsize, 1, sizeBin);
    fNamePrCsHft = sprintf(Exp%d_perTriaIbaseLinePrCsHfts.png,Expr);
    saveas(gcf,fNamePrCsHft);

    soa_plotErrorBars(Expr, sortedtaoI, sortedOPPrCsHfts, fontsize, 1, sizeBin);
    fNamePrCsHft = sprintf(Exp%d_perTriaIOPPrCsHfts.png,Expr);
    saveas(gcf,fNamePrCsHft);

```

```

% Published: August 14, 2019
% Copyright
% Lab for Neural Computation and Adaptation
% RIKEN Center for Brain Science
%
% Objective: Compute the Confidence on Causal Estimate (CCE) along P(Xi=1)
% values in the range [0,1.0] with increments of 0.1

% Cleaners
clear
clc
close all

% Graph display fonts
fontsize = 20;
sizeBin = 200;

% Simulation Conditions
taoInstances = 35000;
Expr = 2; numCond = 3;

tAP=0; dist_tAT0=250; tOP=tAP+dist_tAT0;

% Optimal condition-independent parameters
muA0 = 230;
sigmaA0 = 10;

% Interval length in consideration
T = 250;

% Data Matrices
LB = 0.0; INC = 0.1; UB = 1.0;
arrPX11 = LB:INC:UB;
size_pX11 = numel(arrPX11);
arrCCE = zeros(numCond, size_pX11);

for CondB0 = 1:numCond

    % Read from files taoA and tao0 values derived from a Gaussian distribution
    fnameTaoA = sprintf('Exp%Cond%d_Vec_taoA.csv', Expr, CondB0);
    fnameTao0 = sprintf('Exp%Cond%d_Vec_tao0.csv', Expr, CondB0);
    Vec_taoA = dimread(fnameTaoA);
    Vec_tao0 = dimread(fnameTao0);
    indXPX11 = size_pX11 + 1;

    for PXi_1 = UB:-INC:LB
        PXi_0 = 1 - PXi_1;
        Vec_CCE = soa_InitMatrix(1,taoInstances);

        for indX_tao = 1:taoInstances

            % Do for each pair of taoA and tao0
            taoA = Vec_taoA(indX_tao);
            tao0 = Vec_tao0(indX_tao);

            % Get the reported empirical baseline parameters
            [muA, sigmaA, mu0, sigma0] = soa_IBexperiment(Expr, CondB0);

            % Compute CCE
            Z1 = sqrt(2*pi)*sigmaA0*T;

```

```

% clears all variables from the Workspace
% clears the Command Window

```

```

% Number of taoA and tao0 instances to be generated
% Experimental set-up
% Haggard et al. (2002): Expr = 1; NumCond = 3; (Vol, Invol, Sham)
% Wolpe et al. (2013) : Expr = 2; NumCond = 3; (Low, Int, High)
% Actual physical stimulus timings

```

```

% Large enough but finite constant

```

```
Z0 = T^2;
Theta = log((PXI_1*Z0)/(PXI_0*Z1));
sigmaTot2 = sigmaA^2 + sigma0^2 + sigmaA0^2;
X = Theta - ((tao0-taoA-muA0)^2/(2*sigmaTot2)) + log(sigmaA0/sqrt(sigmaTot2));
Vec_CCE(1,indx_tao) = (sqrt(sigmaTot2)/(2*pi*sigmaA*sigma0*sigmaA0)) *...
    ( 1 / (1 + exp(-X)));
end

uCCE = mean(Vec_CCE(1,:)); sDCCE = std(Vec_CCE(1,:));
fprintf('Condition %d\t P(Xi=1): %0.2f\n', CondB0, PXI_1);
fprintf('CCE      : \t %0.2e(%0.2e)\n', uCCE, sDCCE);

indxPXI1 = indxPXI1 - 1;
arrCCE(CondB0,indxPXI1) = uCCE;
end

% Plot and store CCE as function of causal prior strength
soa_plotBehaviors(EXPR, arrCCE, arrPXI1, fontsize, 1);
fnameCCEPXI = sprintf('Exp%d_CCEPXI.png', EXPR);
saveas(gcf, fnameCCEPXI);
```

```
% Published: August 14, 2019
% Copyright
% Lab for Neural Computation and Adaptation
% RIKEN Center for Brain Science
%
% Objective: Compute the trial-to-trial Confidence on Causal Estimate (CCE)
% Cleaners
clear
clc
close all

% Graph display fonts
fontSize = 20;
sizeBin = 200;

% Simulation Conditions
taoInstances = 35000;
Expr = 1; numCond = 3;

tAp=0; dist_tAt0=250; tOp=tAp+dist_tAt0;

% Optimal condition-independent parameters
muA0 = 230;
sigmaA0 = 10;

% Interval length in consideration
T = 250;

% Data Matrices
Vec_CCE = soa_InitMatrix(numCond, taoInstances);
Vec_taoI = soa_InitMatrix(numCond, taoInstances);
Vec_Pc = soa_InitMatrix(numCond, taoInstances);

for CondB0 = 1:numCond

    % Simulated using the fitted P(Xi=1) optimal values
    if Expr==1
        if CondB0 == 1
            PXi_1 = 0.9;
        elseif CondB0 == 2
            PXi_1 = 0.9;
        else
            PXi_1 = 0.1;
        end
    elseif Expr==2
        if CondB0 == 1
            PXi_1 = 0.9;
        elseif CondB0 == 2
            PXi_1 = 0.6;
        else
            PXi_1 = 0.5;
        end
    end
    PXi_0 = 1 - PXi_1;

    % Read from files taoA and tao0 values derived from a Gaussian distribution
    fnameTaoA = sprintf('Exp%dCond%d_Vec_taoA.csv', Expr, CondB0);
    fnameTao0 = sprintf('Exp%dCond%d_Vec_tao0.csv', Expr, CondB0);
    Vec_taoA = dlmread(fnameTaoA);
    Vec_tao0 = dlmread(fnameTao0);

    % Number of taoA and tao0 instances to be generated
    % Experimental set-up
    % Haggard et al. (2002) : Expr = 1; NumCond = 3; (Vol, Invol, Sham)
    % Wolpe et al. (2013) : Expr = 2; NumCond = 3; (Low, Int, High)
    % Actual physical stimulus timings

    % Large enough but finite constant
end
```

```
for indx_tao = 1:taoInstances
    % Do for each pair of ta0A and ta00
    ta0A = Vec_taoA(indx_tao);
    ta00 = Vec_tao0(indx_tao);

    % Get the reported empirical baseline parameters
    [lnuA, sigmaA, mu0, sigma0] = soa_IBexperiment(Expr, CondB0);

    % Compute CCE
    Z1 = sqrt(2*pi)*sigmaA0*T;
    Z0 = T^2;
    Theta = log((PX1_1*Z0)/(PX1_0*Z1));
    sigmaTot2 = sigmaA^2 + sigma0^2 + sigmaA0^2;
    X = Theta - ((ta00-ta0A-muA0)^2/(2*sigmaTot2)) + log(sigmaA0/sqrt(sigmaTot2));
    Vec_CCE(CondB0, indx_tao) = (sqrt(sigmaTot2)/(2*pi*sigmaA*sigma0*sigmaA0)) *...
        ( 1 / (1 + exp(-X)));

    Vec_taoI(CondB0,indx_tao) = ta00-ta0A;
end
end

% Plot and store trial-to-trial CCE as function of temporal disparity

sortedtaoI = Vec_taoI;
[sortedtaoI(1,:), sortIndx1] = sort(Vec_taoI(1,:));
[sortedtaoI(2,:), sortIndx2] = sort(Vec_taoI(2,:));
[sortedtaoI(3,:), sortIndx3] = sort(Vec_taoI(3,:));

sortedCCE = soa_sortMatrices(Vec_CCE, sortIndx1, sortIndx2, sortIndx3);
soa_plotErrorBars(Expr, sortedtaoI, sortedCCE, fontsize, 1, sizeBin);
fnameCCE = sprintf('Exp%d_perTrialCCE.png', Expr);
saveas(gcf, fnameCCE);
```

```
% Published: August 14, 2019
% Copyright
% Lab for Neural Computation and Adaptation
% RIKEN Center for Brain Science
%
% Objective: Return the means and standard deviations of the reported
% baseline action and outcome timing judgment errors

function [mu_A, sigma_A, mu_0, sigma_0] = soa_IBexperiment(experiment_case, condition)

if experiment_case == 1
    % Haggard et al., 2002 (Nat Neurosci): Seminal intentional binding experiment
    % Different keypress (i.e., the action) conditions
        if condition == 1
            mu_A = 6; sigma_A = 66;
        elseif condition == 2
            mu_A = 83; sigma_A = 83;
        elseif condition == 3
            mu_A = 32; sigma_A = 78;
        end
        mu_0 = 15; sigma_0 = 72;
    elseif experiment_case == 2
        % Wolpe et al., 2013 (Exp Brain Res): Uncertainty is with the outcome
        % Different tone (i.e., the outcome) conditions
            mu_A = -8; sigma_A = 75;
            if condition == 1
                mu_0 = 35; sigma_0 = 61;
            elseif condition == 2
                mu_0 = 46; sigma_0 = 66;
            elseif condition == 3
                mu_0 = 95; sigma_0 = 90;
            end
        end
    end
end
```

```
% Published: August 14, 2019
% Copyright
% Lab for Neural Computation and Adaptation
% RIKEN Center for Brain Science
% Objective: Return the reported action and outcome perceptual shifts
% for the operant conditions
function [trgtPrCShta, trgtPrCShta0] = soa_IBTargets(experiment, condition)

if experiment == 1
    % Haggard et al., 2002 (Nat Neurosci): Seminal intentional binding experiment
    % Different keypress (i.e., the action) conditions
    if condition == 1
        trgtPrCShta = 15;
        trgtPrCShta0 = -46;
    elseif condition == 2
        trgtPrCShta = -27;
        trgtPrCShta0 = 31;
    elseif condition == 3
        trgtPrCShta = -7;
        trgtPrCShta0 = -8;
    end
elseif experiment == 2
    % Wolpe et al. 2013 (Exp Brain Res): Uncertainty is with the outcome
    % Different tone (i.e., the outcome) conditions
    if condition == 1
        trgtPrCShta = 39;
        trgtPrCShta0 = -51;
    elseif condition == 2
        trgtPrCShta = 31;
        trgtPrCShta0 = -65;
    elseif condition == 3
        trgtPrCShta = 32;
        trgtPrCShta0 = -105;
    end
end
```

```
% Published: August 14, 2019
% Copyright
% Lab for Neural Computation and Adaptation
% RIKEN Center for Brain Science
%
% Objective: Instantiate a rows-by-cols matrix with zero values
function [matrix_] = soa_InitMatrix(rows_, cols_)
matrix_ = zeros(rows_, cols_);
```



```
% Published: August 14, 2019
% Copyright
% Lab for Neural Computation and Adaptation
% RIKEN Center for Brain Science
%
% Objective: Sort the contents of the matrices

function [sortedMatrix] = soa_sortMatrices(vectMatrix, sortIndx1, sortIndx2, sortIndx3)

    sortedMatrix = vectMatrix;
    sortedMatrix(1,:) = vectMatrix(1,sortIndx1);
    sortedMatrix(2,:) = vectMatrix(2,sortIndx2);
    sortedMatrix(3,:) = vectMatrix(3,sortIndx3);
```

```

% Published: August 14, 2019
% Copyright
% Lab for Neural Computation and Adaptation
% RIKEN Center for Brain Science
% Objective: Graph the action and outcome perceptual shifts as functions of
% the strength of the causal prior
function F = soa_plotPrCsHts(experiment, arrPrCsHtA, arrPrCsHtO, arrPXI1, fontsize)
F = figure;
linewidth = 2;

if experiment == 1
    % Haggard et al., 2002 (Nat Neurosci): Seminal intentional binding experiment
    % Different keypress (i.e., the action) conditions
    plot(arrPXI1,arrPrCsHtA(1,:),'b-', arrPXI1,arrPrCsHtO(1,:),'b--','....
        arrPXI1,arrPrCsHtA(2,:),'r-', arrPXI1,arrPrCsHtO(2,:),'r--','....
        arrPXI1,arrPrCsHtA(3,:),'k-', arrPXI1,arrPrCsHtO(3,:),'k--','....','linewidth',linewidth);
    %legend('Voluntary Action',' Tone', 'Involuntary MEP', 'Tone', 'Sham TMS', 'Tone', 'Location', 'northwest');
    lgnd = legend('Voluntary action',' and tone', 'Involuntary action',' and tone',' Sham', ' and tone', 'Location', 'northwest', 'Orientation','vertical');
    lgnd.FontSize = 18;
    set(lgnd.BoxFace, 'ColorType', 'truecoloralpha', 'ColorData', uint8(255*[1; 1; 1; 0.8]));
elseif experiment == 2
    % Wolpe et al. 2013 (Exp Brain Res): Uncertainty is with the outcome
    % Different tone (i.e., the outcome) conditions
    hold on;
    plot(arrPXI1,arrPrCsHtA(1,:),'Color', [0 0 250/255], [0 0 250/255], 'LineStyle','-', 'linewidth',linewidth);
    plot(arrPXI1,arrPrCsHtO(1,:),'Color', [0 0 250/255], [0 0 250/255], 'LineStyle','-', 'linewidth',linewidth);
    plot(arrPXI1,arrPrCsHtA(2,:),'Color', [0 140/255 255/255], [0 140/255 255/255], 'LineStyle','-', 'linewidth',linewidth);
    plot(arrPXI1,arrPrCsHtO(2,:),'Color', [0 140/255 255/255], [0 140/255 255/255], 'LineStyle','-', 'linewidth',linewidth);
    plot(arrPXI1,arrPrCsHtA(3,:),'Color', [0 240/255 255/255], [0 240/255 255/255], 'LineStyle','-', 'linewidth',linewidth);
    plot(arrPXI1,arrPrCsHtO(3,:),'Color', [0 240/255 255/255], [0 240/255 255/255], 'LineStyle','-', 'linewidth',linewidth);
    lgnd = legend('Action', ' and low uncertainty tone', 'Action', ' and intermediate uncertainty tone', 'Action', ' and high uncertainty tone', 'Location', 'northwest');
    lgnd.FontSize = 18;
    set(lgnd.BoxFace, 'ColorType', 'truecoloralpha', 'ColorData', uint8(255*[1; 1; 1; 0.8]));
end
set(gca,'FontSize', fontsize);
set(gca,'Box','on');
set(lgnd,'Color','none');
set(gca,'color','white');
set(gca,'FontSize', fontsize);

```

```
% Published: August 14, 2019
% Copyright
% Lab for Neural Computation and Adaptation
% : RIKEN Center for Brain Science
% Objective: Plot the optimal behaviors used in the figures of the paper with ERROR BARS displayed

function F = soa_plotErrorBars(experiment, axes, arrBehavior, fontsize, flag, sizeBin)

F = figure;
markersize = 27;
linewidth = 0.1;

if experiment == 1
    % Haggard et al., 2002 (Nat Neurosci): Seminal intentional binding experiment
    % Different keypress (i.e., the action) conditions
    hold all
    if flag == 1
        errorbar(mean(reshape(axes(1,:),sizeBin,[],1), mean(reshape(arrBehavior(1,:),sizeBin,[],1), 'std(reshape(arrBehavior(1,:),sizeBin,[],1), 'k', 'linewidth', 'markerSize', '
        markersize);
        errorbar(mean(reshape(axes(2,:),sizeBin,[],1), mean(reshape(arrBehavior(2,:),sizeBin,[],1), 'std(reshape(arrBehavior(2,:),sizeBin,[],1), 'k', 'linewidth', 'markerSize', '
        markersize);
        errorbar(mean(reshape(axes(3,:),sizeBin,[],1), mean(reshape(arrBehavior(3,:),sizeBin,[],1), 'std(reshape(arrBehavior(3,:),sizeBin,[],1), 'k', 'linewidth', 'markerSize', '
        markersize);
        lgnd = legend('Voluntary condition','Involuntary condition','Sham condition','Location','northwest');
    else if flag == 2
        errorbar(mean(reshape(axes(2,:),sizeBin,[],1), mean(reshape(arrBehavior(2,:),sizeBin,[],1), 'std(reshape(arrBehavior(2,:),sizeBin,[],1), 'k', 'linewidth', 'markerSize', '
        markersize);
        errorbar(mean(reshape(axes(1,:),sizeBin,[],1), mean(reshape(arrBehavior(1,:),sizeBin,[],1), 'std(reshape(arrBehavior(1,:),sizeBin,[],1), 'k', 'linewidth', 'markerSize', '
        markersize);
        lgnd = legend('Voluntary condition','Involuntary condition','Location','northwest');
    end
    set(lgnd,'BoxFace','ColorType','truecoloralpha','ColorData',uint8(255*[1; 1; 0.8]));
    set(gca,'Box','on');
    hold off
elseif experiment == 2
    % Wolpe et al. 2013 (Exp Brain Res): Uncertainty is with the outcome
    % Different tone (i.e., the outcome) conditions
    hold all
    if flag == 1
        errorbar(mean(reshape(axes(1,:),sizeBin,[],1), mean(reshape(arrBehavior(1,:),sizeBin,[],1), 'std(reshape(arrBehavior(1,:),sizeBin,[],1), 'k', 'linewidth', 'markerSize', '
        markersize);
        errorbar(mean(reshape(axes(2,:),sizeBin,[],1), mean(reshape(arrBehavior(2,:),sizeBin,[],1), 'std(reshape(arrBehavior(2,:),sizeBin,[],1), 'k', 'linewidth', 'markerSize', '
        markersize);
        errorbar(mean(reshape(axes(3,:),sizeBin,[],1), mean(reshape(arrBehavior(3,:),sizeBin,[],1), 'std(reshape(arrBehavior(3,:),sizeBin,[],1), 'k', 'linewidth', 'markerSize', '
        markersize);
        lgnd = legend('Low uncertainty','Intermediate uncertainty','High uncertainty','Location','northwest');
        set(lgnd,'BoxFace','ColorType','truecoloralpha','ColorData',uint8(255*[1; 1; 0.8]));
        set(gca,'Box','on');
        hold off
```

```
end  
set(gca,'FontSize', fontsize);
```

```

% Function to graph the SoA related measures
% Added 09/06/2017

function F = soa_plotBehaviors(experiment, arrBehavior, arrPX11, fontsize, behavior)

    F = figure;
    linewidth = 2;

    if experiment == 1

        if behavior == 1
            plot( arrPX11,arrBehavior(1,:),'b', arrPX11,arrBehavior(2,:),'r', arrPX11,arrBehavior(3,:),'k', 'Linewidth', linewidth);
        %f
            hold all
            plot(arrPX11,arrBehavior(1,:),'b', 'Linewidth', 3);
            plot(arrPX11,arrBehavior(2,:),'r', 'Linewidth', 3);
            plot(arrPX11,arrBehavior(3,:),'Color', [0 0 1]+0.05*13, 'Linewidth', 3);
            hold off
        %f
        elseif behavior == 3
            plot( arrPX11,arrBehavior(2,:),'r', arrPX11,arrBehavior(1,:),'b', arrPX11,arrBehavior(3,:),'k', 'Linewidth', linewidth);
        elseif behavior == 0
            plot( arrPX11,arrBehavior(1,:),'b', arrPX11,arrBehavior(2,:),'r', 'Linewidth', linewidth);
        elseif behavior == 2
            ylim([0.0 1.0]);
            plot( arrPX11,arrBehavior(1,:),'b', arrPX11,arrBehavior(2,:),'r', 'Linewidth', linewidth);
        end
        elseif experiment == 2

            hold on;
            plot(arrPX11,arrBehavior(1,:),'Color', [0 0 250/255], 'LineStyle','-', 'Linewidth', linewidth);
            plot(arrPX11,arrBehavior(2,:),'Color', [0 140/255 255/255], 'LineStyle','-', 'Linewidth', linewidth);
            plot(arrPX11,arrBehavior(3,:),'Color', [0 240/255 255/255], 'LineStyle','-', 'Linewidth', linewidth);
            hold off;
        elseif experiment == 3

            hold on;
            plot(arrPX11,arrBehavior(1,:),'Color', [0 0 250/255], 'LineStyle','-', 'Linewidth', linewidth);
            plot(arrPX11,arrBehavior(2,:),'Color', [0 140/255 255/255], 'LineStyle','-', 'Linewidth', linewidth);
            hold off;
        end

        %f
        xlabel('P(\xi=1) of Prior');
        if behavior == 1
            ylabel('Feeling of Agency');
        elseif behavior == 2
            ylabel('Judgment of Agency');
        elseif behavior == 3
            ylabel('Bias in Action Estimates');
        elseif behavior == 4
            ylabel('Bias in Outcome Estimates');
        end
        %f
    if experiment == 1

        if behavior == 1
            lgnd = legend('Voluntary condition', 'Involuntary condition', 'Sham condition', 'Location', 'northwest');
        elseif behavior == 3
            lgnd = legend('Voluntary condition', 'Involuntary condition', 'Sham condition', 'Location', 'northwest');
        else

```

```
    lgnd = legend('Voluntary condition','Involuntary condition','Sham condition', 'Location', 'northwest');  
end  
elseif experiment == 2  
    lgnd = legend('Low uncertainty condition', 'Intermediate uncertainty condition', 'High uncertainty condition', 'Location', 'northeast');  
elseif experiment == 3  
    lgnd = legend('Active, Instructed', 'Passive, Instructed', 'Location', 'northeast');  
end  
set(gca, 'FontSize', fontsize);  
set(gca, 'Box', 'on');  
%set(lgnd, 'Color', 'none');  
set(gca, 'color', 'white');  
set(lgnd, 'BoxFace', 'ColorType', 'truecoloralpha', 'ColorData', uint8(255*[1; 1; 0.8]));  
  
% If you want to bold  
%ylabel('Feeling of Agency', 'FontWeight', 'bold');
```
